# Supplementary material for: Incidence of Primary End Point Changes Among Active Cancer Phase 3 Randomized Clinical Trials
Source: PubMed Central journal article supplement (PMC10193180; doi:10.1001/jamanetworkopen.2023.13819), 2023-05-17
Supplement: jamanetwopen-e2313819-s001.pdf [file jamanetwopen-e2313819-s001.pdf]

## Data Sharing Statement

Florez. Incidence of Primary End Point Changes Among Active Cancer Phase 3 Randomized Clinical Trials. *JAMA Netw Open*. Published May 17, 2023.

doi:10.1001/jamanetworkopen.2023.13819

### Data

**Data available:** No

### Additional Information

**Explanation for why data not available:** All data is already publically available
